# Supplementary material for: Identification of Gedunin from a Phytochemical Depository as a Novel Multidrug Resistance-Bypassing Tubulin Inhibitor of Cancer Cells
Source: MDPI journal article supplement (doi:10.3390/molecules27185858), 2022-09-09
Supplement: s1 [file s1]

## Supplementary file

# Identification of gedunin from a phytochemical depository as a novel multidrug resistance-bypassing tubulin inhibitor of cancer cells

Sami A. Khalid<sup>1,\*</sup>, Mona Dawood<sup>2,4</sup>, Joelle C. Boulos<sup>2</sup>, Monica Wasfi<sup>1</sup>, Assia Drif<sup>2</sup>, Mohamed E. M. Saeed<sup>2</sup>, Faranak Bahramimehr<sup>2</sup>, Nasim Shahhamzehei<sup>2</sup>, Letian Shan<sup>3</sup>, Thomas Efferth<sup>2,\*</sup>

<sup>1</sup> Faculty of Pharmacy, University of Science & Technology, Omdurman, Sudan

<sup>2</sup> Department of Pharmaceutical Biology, Institute of Pharmaceutical and Biomedical Sciences, Johannes Gutenberg University, Staudinger Weg 5, 55128 Mainz, Germany

<sup>3</sup> The First Affiliated Hospital, Zhejiang Chinese Medical University, Hangzhou, 310053, Zhejiang, China

<sup>4</sup> Home address: Department of Molecular Biology, Faculty of Medical Laboratory Sciences, Al-Neelain University, Khartoum, Sudan

\* Correspondence:

S. Khalid (E-mail: khalidseek@hotmail.com)

T. Efferth (E-mail: efferth@uni-mainz.de)

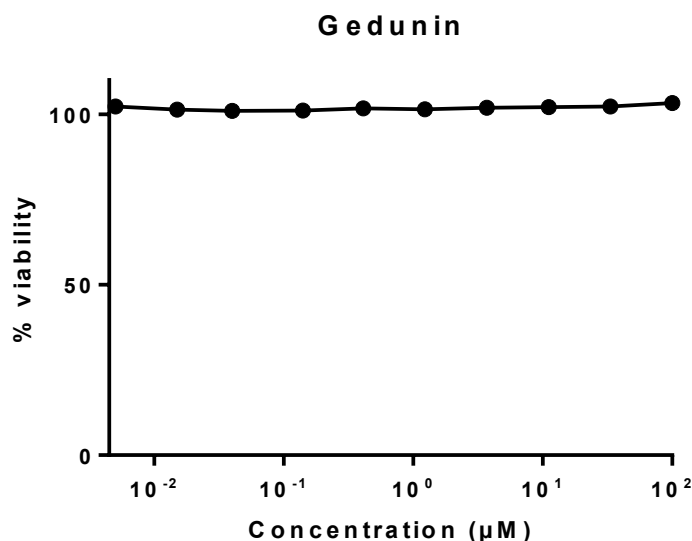

**Supplementary Figure S1:** Cytotoxicity of Gedunin on PBMCs. Each point illustrates the mean value  $\pm$  SD of two independent experiments with six replicates each.

**Supplementary Table SI:** Characteristics of phytochemicals with SAK-T code.

| Code   | Compound                      | MW     | CID Code | 2D Structure                                                                         |
|--------|-------------------------------|--------|----------|--------------------------------------------------------------------------------------|
| SAK-T1 | (-)-Scopolamine hydrochloride | 339.82 | 6852406  | 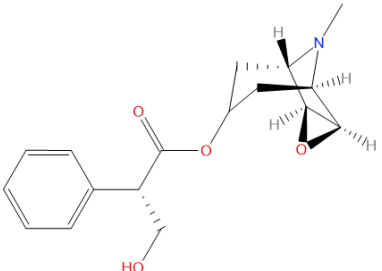   |
| SAK-T2 | (+)-Bicuculline               | 367.35 | 10237    |    |
| SAK-T3 | (+)-Laudanosine               | 357.45 | 73397    |   |
| SAK-T4 | (+)-Tubocurarine              | 609.74 | 6000     |  |
| SAK-T5 | (+)-Usnic acid                | 344.31 | 442614   |  |
| SAK-T6 | 1,8-Dihydroxyanthraquinone    | 240.21 | 2950     |  |

|         |                                      |         |          |                                                                                      |
|---------|--------------------------------------|---------|----------|--------------------------------------------------------------------------------------|
| SAK-T7  | 18-beta-Glycyrrhetic acid            | 470.69  | 10114    | 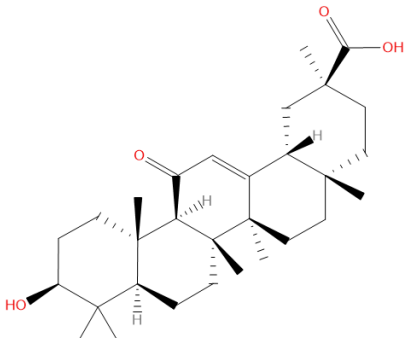   |
| SAK-T8  | 3,5-Dimethoxy-4-hydroxycinnamic acid | 224.21  | 637775   |    |
| SAK-T9  | Alloptaeroxylin                      | 258.27  | 12305984 |    |
| SAK-T10 | Apigenin                             | 270.24  | 5280443  |  |
| SAK-T11 | Aristolochic acid                    | 341.27  | 2236     |  |
| SAK-T12 | Barbaloin                            | 418.398 | 12305761 |  |
| SAK-T13 | Berberine                            | 371.81  | 2353     |  |

|         |            |        |         |                                                                                      |
|---------|------------|--------|---------|--------------------------------------------------------------------------------------|
| SAK-T14 | Boldine    | 327.38 | 10154   | 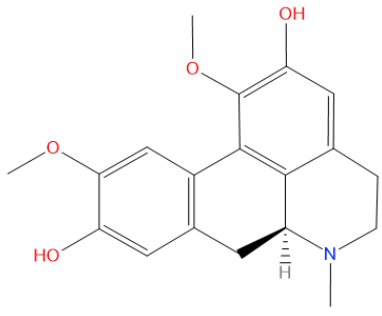   |
| SAK-T15 | Colchicine | 399.44 | 6167    |    |
| SAK-T16 | Cryptopine | 369.41 | 72616   |    |
| SAK-T17 | Cumarin    | 146.14 | 323     |   |
| SAK-T18 | Digitoxin  | 764.95 | 441207  |  |
| SAK-T19 | Digoxin    | 780.94 | 2724385 |  |

|         |                         |        |         |                                                                                      |
|---------|-------------------------|--------|---------|--------------------------------------------------------------------------------------|
| SAK-T20 | Diosgenin               | 414.63 | 99474   | 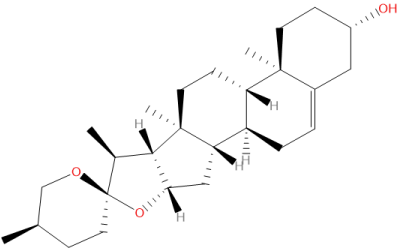   |
| SAK-T21 | Emetine dihydrochloride | 553.56 | 3068143 |    |
| SAK-T22 | Emodin                  | 270.24 | 3220    |    |
| SAK-T23 | Emodin anthrone         | 256.26 | 122635  |   |
| SAK-T25 | Esculetin               | 178.14 | 5281416 |  |
| SAK-T26 | Esculin                 | 340.28 | 5281417 |  |
| SAK-T27 | Frangulin               | 416.37 | 348160  |  |
| SAK-T28 | Fraxin                  | 370.31 | 5273568 |  |

|         |            |         |          |                                                                                      |
|---------|------------|---------|----------|--------------------------------------------------------------------------------------|
| SAK-T29 | Gedunine   | 482.57  | 12004512 | 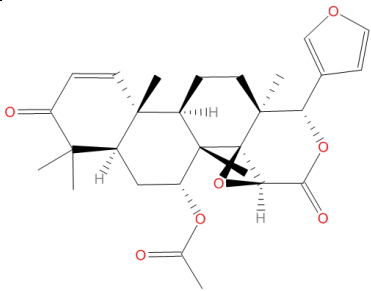   |
| SAK-T30 | Gentibiose | 342.30  | 5460026  |    |
| SAK-T31 | Harmaline  | 214.26  | 3564     |   |
| SAK-T32 | Harman     | 182.22  | 5281404  |  |
| SAK-T33 | Harmine    | 212.25  | 5280953  |  |
| SAK-T34 | Hesperetin | 302.282 | 72281    |  |
| SAK-T35 | Hesperidin | 610.57  | 10621    |  |

|         |                |        |          |                                                                                      |
|---------|----------------|--------|----------|--------------------------------------------------------------------------------------|
| SAK-T36 | Heteropeucenin | 260.29 | 12310443 | 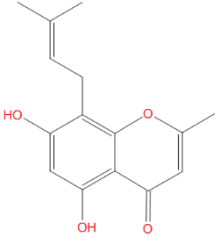   |
| SAK-T37 | Khellin        | 260.24 | 3828     |    |
| SAK-T38 | Lawsone        | 174.15 | 6755     |   |
| SAK-T39 | Lupeol         | 426.72 | 259846   |  |
| SAK-T40 | Morin          | 302.24 | 5281670  |  |
| SAK-T41 | Narceine       | 445.47 | 8564     |  |
| SAK-T42 | Narcotine      | 413.42 | 4544     |  |

|         |                                                           |        |          |                                                                                      |
|---------|-----------------------------------------------------------|--------|----------|--------------------------------------------------------------------------------------|
| SAK-T43 | Oleandrin                                                 | 576.72 | 11541511 | 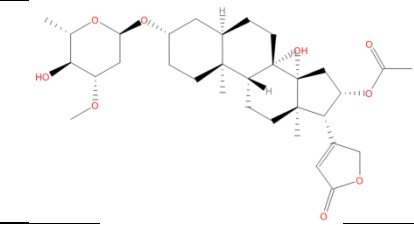   |
| SAK-T45 | Papaverine                                                | 375.85 | 6084     |    |
| SAK-T46 | Peucenin,<br>(5,7-dihydroxy-6-isopentyl-2-methylchromone) | 274.12 | 68477    |    |
| SAK-T47 | Physostigmine                                             | 275.35 | 5983     |   |
| SAK-T48 | Pilocarpine                                               | 208.26 | 5910     |  |
| SAK-T49 | Piperine                                                  | 285.34 | 638024   |  |
| SAK-T50 | Psoralen                                                  | 186.16 | 6199     |  |
| SAK-T51 | Ptaeroxylan                                               | 258.27 | 3646533  |  |



|         |                     |        |          |                                                                                      |
|---------|---------------------|--------|----------|--------------------------------------------------------------------------------------|
| SAK-T52 | Quercetin dihydrate | 338.27 | 5280343  | 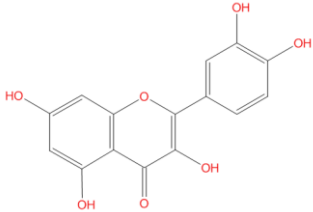   |
| SAK-T53 | Quinidine           | 324.42 | 441074   |    |
| SAK-T54 | Quinine sulphate    | 782.96 | 16211610 |    |
| SAK-T55 | Rotenone            | 394.42 | 6758     |   |
| SAK-T58 | Rutin               | 610.52 | 5280805  |  |
| SAK-T59 | Sanguinarine        | 367.78 | 68635    |  |
| SAK-T60 | Santonin            | 246.30 | 221071   |  |

|         |                      |         |          |                                                                                      |
|---------|----------------------|---------|----------|--------------------------------------------------------------------------------------|
| SAK-T61 | Scopoletine          | 192.17  | 5280460  | 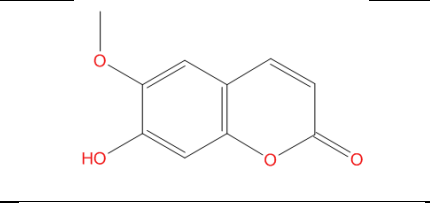   |
| SAK-T62 | Silibinin            | 482.441 | 31553    |    |
| SAK-T63 | Sinigrin monohydrate | 415.47  | 23670774 |    |
| SAK-T64 | Stigmasterol         | 412.69  | 5280794  |   |
| SAK-T65 | Strophanthidin       | 404.5   | 6185     |  |
| SAK-T66 | Strychnine           | 334.42  | 441071   |  |
| SAK-T67 | Thebaine alkaloid    | 311.38  | 5321926  |  |

|         |                         |         |         |                                                                                                                                                                                                                                                                                                                                              |
|---------|-------------------------|---------|---------|----------------------------------------------------------------------------------------------------------------------------------------------------------------------------------------------------------------------------------------------------------------------------------------------------------------------------------------------|
| SAK-T68 | Ursolic acid            | 456.71  | 64945   | 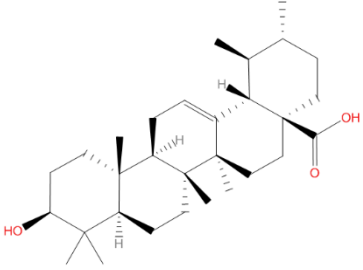 <p>Chemical structure of Ursolic acid, a pentacyclic triterpene carboxylic acid. It features a complex polycyclic core with multiple methyl groups and a carboxylic acid group (COOH) highlighted in red.</p>                                             |
| SAK-T69 | Vincamine               | 354.44  | 15376   |  <p>Chemical structure of Vincamine, a tropane alkaloid. It consists of a tropane ring system with a phenyl group and a methoxycarbonyl group (COOCH<sub>3</sub>) highlighted in red.</p>                                                                  |
| SAK-T70 | Yohimbine hydrochloride | 390.91  | 6169    |  <p>Chemical structure of Yohimbine hydrochloride, a tropane alkaloid. It features a tropane ring system with a phenyl group and a methoxycarbonyl group (COOCH<sub>3</sub>) highlighted in red.</p>                                                      |
| SAK-T71 | $\beta$ -Escin          | 1131.26 | 6540709 |  <p>Chemical structure of <math>\beta</math>-Escin, a saponin. It consists of a steroid-like aglycone core with multiple hydroxyl groups and a complex sugar moiety (glycone) attached via an ester linkage. The glycone part is highlighted in red.</p> |

|         |           |        |        |                                                                                    |
|---------|-----------|--------|--------|------------------------------------------------------------------------------------|
| SAK-T72 | P-Arbutin | 272.25 | 440936 | 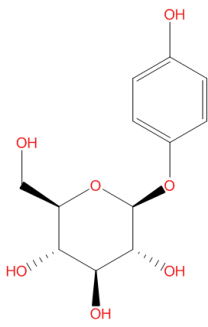 |
|---------|-----------|--------|--------|------------------------------------------------------------------------------------|

**Supplementary Table S2.** Pearson correlation test-based COMPARE analysis of proteins directly or inversely correlating with the log<sub>10</sub>IC<sub>50</sub> values of gedunin in 55 tumor cell lines. The protein functions have been extracted from the GeneCards database (<https://www.genecards.org>).

| Symbol         | <i>r</i> -Value | <i>p</i> -Value       | Entry Gene ID | Name                                                           | Function                                                                                                                                                                                                            |
|----------------|-----------------|-----------------------|---------------|----------------------------------------------------------------|---------------------------------------------------------------------------------------------------------------------------------------------------------------------------------------------------------------------|
| <b>MOGS</b>    | 0.474           | $1.28 \times 10^{-4}$ | 7841          | Mannosyl-oligosaccharide glucosidase                           | Cleavage of glucose from oligosaccharide precursor                                                                                                                                                                  |
| <b>PDS5A</b>   | 0.454           | $2.51 \times 10^{-4}$ | 23244         | PDS5 cohesin-associated factor A                               | Regulation of sister chromatid cohesion during mitosis                                                                                                                                                              |
| <b>IKBKAP</b>  | 0.438           | $4.15 \times 10^{-4}$ | 8518          | Elongator acetyltransferase complex subunit 1                  | Binding of NF- $\kappa$ B-inducing kinase and I- $\kappa$ B kinases to active the kinase complex                                                                                                                    |
| <b>SLC12A4</b> | 0.432           | $4.90 \times 10^{-4}$ | 6560          | Solute carrier family 12 member 4                              | Coupled movement of potassium and chloride ions across the plasma membrane                                                                                                                                          |
| <b>SPECC1</b>  | 0.425           | $6.17 \times 10^{-4}$ | 92521         | Sperm antigen with calponin homology and coiled-coil domains 1 | May cause juvenile myelomonocytic leukemia.                                                                                                                                                                         |
| <b>GDF15</b>   | 0.419           | $7.22 \times 10^{-4}$ | 9518          | Growth differentiation factor 15                               | Binding of TGF- $\beta$ receptors leads to the recruitment and activation of SMAD family transcription factors for gene expression. Involved in the stress response program of cells after cellular injury          |
| <b>NUDC</b>    | 0.402           | $1.16 \times 10^{-3}$ | 10726         | Nuclear distribution C, dynein complex regulator               | Spindle formation in mitosis and microtubule organization during cytokinesis.                                                                                                                                       |
| <b>PA2G4</b>   | 0.397           | $1.32 \times 10^{-3}$ | 5036          | Proliferation-associated 2G4                                   | Ribosome assembly and regulation of rRNA processing. Transcriptional co-repressor of cell cycle genes by interacting with histone deacetylases. Implicated in growth inhibition and differentiation of cancer cells |
| <b>IMPDH2</b>  | 0.386           | $1.78 \times 10^{-3}$ | 3615          | Inosine monophosphate dehydrogenase 2                          | De novo guanine nucleotide biosynthesis for DNA and RNA synthesis. Role in malignant transformation                                                                                                                 |
| <b>RPS28</b>   | 0.384           | $1.88 \times 10^{-3}$ | 6234          | Ribosomal protein S28                                          | Involved in ribosomal protein synthesis                                                                                                                                                                             |
| <b>PEA15</b>   | 0.377           | $2.27 \times 10^{-3}$ | 8682          | Proliferation and apoptosis adaptor protein 15                 | Negative apoptosis regulator.                                                                                                                                                                                       |
| <b>REEP5</b>   | 0.376           | $2.35 \times 10^{-3}$ | 7905          | Receptor accessory protein 5                                   | Involved in endoplasmic reticulum organization and regulation of intracellular transport                                                                                                                            |
| <b>HM13</b>    | 0.374           | $2.43 \times 10^{-3}$ | 81502         | Histocompatibility minor 13                                    | Intramembrane proteolysis of signal peptides                                                                                                                                                                        |
| <b>PGRMC1</b>  | 0.366           | $2.96 \times 10^{-3}$ | 10857         | Progesterone receptor membrane component 1                     | Putative membrane-associated progesterone steroid receptor                                                                                                                                                          |

|                |        |                       |       |                                                                                    |                                                                                                                                    |
|----------------|--------|-----------------------|-------|------------------------------------------------------------------------------------|------------------------------------------------------------------------------------------------------------------------------------|
| <b>B2M</b>     | 0.365  | $3.08 \times 10^{-3}$ | 567   | $\beta$ -2-Microglobulin                                                           | Serum protein associated with the major histocompatibility complex (MHC) class I heavy chain                                       |
| <b>AQR</b>     | 0.365  | $3.09 \times 10^{-3}$ | 9716  | Aquarius intron-binding spliceosomal factor                                        | Involved in mRNA splicing via spliceosome                                                                                          |
| <b>HNRNPC</b>  | 0.364  | $3.17 \times 10^{-3}$ | 3183  | Heterogeneous nuclear ribonucleoprotein C                                          | RNA-binding protein influencing pre-mRNA processing                                                                                |
| <b>PSMA7</b>   | 0.359  | $3.55 \times 10^{-3}$ | 5688  | Proteasome 20S subunit $\alpha 7$                                                  | Part of the 26S proteasome. Role in the cellular stress response by regulating hypoxia-inducible factor-1 $\alpha$                 |
| <b>EIF3G</b>   | 0.359  | $3.57 \times 10^{-3}$ | 8666  | Eukaryotic translation initiation factor 3 subunit G                               | Initiation of protein translation                                                                                                  |
| <b>TRAP1</b>   | 0.358  | $3.67 \times 10^{-3}$ | 10131 | Tumor necrosis factor type 1 receptor-associated protein 1                         | Mitochondrial chaperone and member of the heat shock protein 90 (HSP90) family. Regulator of cellular stress responses             |
| <b>DDX21</b>   | -0.483 | $9.22 \times 10^{-5}$ | 9188  | DEAD (Asp-Glu-Ala-Asp) box helicase 21                                             | Putative RNA helicase implicated in alterations of the RNA secondary structure. Involved in cellular growth and division           |
| <b>MSH2</b>    | -0.475 | $1.25 \times 10^{-4}$ | 4436  | MutS ( <i>E. coli</i> ) homolog 2 (colon cancer, nonpolyposis type 1)              | Mismatch repair gene mutS                                                                                                          |
| <b>UBE2S</b>   | -0.469 | $1.54 \times 10^{-4}$ | 27338 | Ubiquitin conjugating enzyme E2 S                                                  | Ubiquitin-conjugating enzyme and ubiquitin carrier protein                                                                         |
| <b>DRG1</b>    | -0.460 | $2.05 \times 10^{-4}$ | 4733  | Developmentally regulated GTP binding protein 1                                    | Positive regulation of microtubule polymerization and mitotic spindle assembly                                                     |
| <b>EIF3I</b>   | -0.457 | $2.25 \times 10^{-4}$ | 8668  | Eukaryotic translation initiation factor 3 subunit I                               | Involved in translational initiation                                                                                               |
| <b>NEBL</b>    | -0.453 | $2.61 \times 10^{-4}$ | 10529 | Nebulette                                                                          | Binding of actin and interaction with thin filaments and Z-line-associated proteins in striated muscle                             |
| <b>EIF3E</b>   | -0.454 | $2.52 \times 10^{-4}$ | 3646  | Eukaryotic translation initiation factor 3 subunit E                               | Positive regulation of mRNA binding activity, gene expression, and translational initiation                                        |
| <b>CARM1</b>   | -0.453 | $2.54 \times 10^{-4}$ | 10498 | Coactivator-associated arginine methyltransferase 1                                | Methylation of histones and other chromatin-associated proteins. Regulation of gene expression                                     |
| <b>PPP2R1B</b> | -0.452 | $2.66 \times 10^{-4}$ | 5519  | Protein phosphatase 2 (formerly 2A), regulatory subunit A (PR 65), $\beta$ isoform | Ser/Thr phosphatase implicated in the negative control of cell growth and division                                                 |
| <b>AP2A1</b>   | -0.450 | $2.80 \times 10^{-4}$ | 160   | Adaptor-related protein complex 2 subunit $\alpha 1$                               | Component of the adaptor protein complex 2 (AP-2). Protein transport via transport vesicles in different membrane traffic pathways |

|               |        |                       |       |                                                                              |                                                                                                                     |
|---------------|--------|-----------------------|-------|------------------------------------------------------------------------------|---------------------------------------------------------------------------------------------------------------------|
| <b>SEC22B</b> | -0.448 | $2.97 \times 10^{-4}$ | 9554  | SEC22 vesicle trafficking protein homolog B ( <i>S. cerevisiae</i> )         | Endoplasmic reticulum to Golgi protein trafficking                                                                  |
| <b>YIPF5</b>  | -0.447 | $3.15 \times 10^{-4}$ | 81555 | Yip1 domain family member 5                                                  | Regulation of endoplasmic reticulum to Golgi vesicle-mediated transport                                             |
| <b>ITGAV</b>  | -0.446 | $3.22 \times 10^{-4}$ | 3685  | Integrin, Alpha V (vitronectin receptor, $\alpha$ polypeptide, antigen CD51) | Cell surface adhesion and signaling. Regulation of angiogenesis and cancer progression                              |
| <b>ABCD3</b>  | -0.445 | $3.30 \times 10^{-4}$ | 5825  | ATP-binding cassette subfamily D member 3                                    | Role in peroxisome biogenesis by fatty acid transport                                                               |
| <b>GNAI3</b>  | -0.445 | $3.31 \times 10^{-4}$ | 2773  | Guanine nucleotide-binding protein G(I) subunit $\alpha$ -3                  | Transmembrane signal transduction.                                                                                  |
| <b>MBOAT7</b> | -0.443 | $3.51 \times 10^{-4}$ | 79143 | Membrane-bound O-acyltransferase domain-containing 7                         | Membrane-bound O-acyltransferase domain-containing 7                                                                |
| <b>GNAI1</b>  | -0.440 | $3.86 \times 10^{-4}$ | 2770  | Guanine nucleotide-binding protein G(I) subunit $\alpha$ 1                   | Signal transduction of $\beta$ -adrenergic signals by inhibiting adenylate cyclase                                  |
| <b>MMGT1</b>  | -0.438 | $4.11 \times 10^{-4}$ | 93380 | Membrane magnesium transporter 1                                             | Membrane insertase activity for endoplasmic reticulum proteins                                                      |
| <b>EIF3H</b>  | -0.438 | $4.16 \times 10^{-4}$ | 8667  | Eukaryotic translation initiation factor 3 subunit H                         | Deubiquitinase and translation initiation factor activities. Implicated in breast, prostate, and prostate carcinoma |
| <b>FAF2</b>   | -0.436 | $4.38 \times 10^{-4}$ | 91942 | Fas-associated factor family member 2                                        | Apoptosis resistance to apoptosis in T cells and eosinophils                                                        |
